# Supplementary material for: Synthesis of fluorinated alkoxyamines and alkoxyamine-initiated nitroxide-mediated precipitation polymerizations of styrene in supercritical carbon dioxide
Source: Royal Society of Chemistry journal article supplement (doi:10.1039/c4py00757c), 2014-01-01
Supplement: c4py00757c1.pdf [file c4py00757c1.pdf]

# Synthesis of fluorinated alkoxyamines and alkoxyamine-initiated nitroxide-mediated precipitation polymerizations of styrene in supercritical carbon dioxide

Christopher Magee, Aruna Earla, Jennifer Petraitis, Chad Higa, Rebecca Braslau, Per B. Zetterlund and Fawaz Aldabbagh

## Electronic Supplementary Information (ESI)

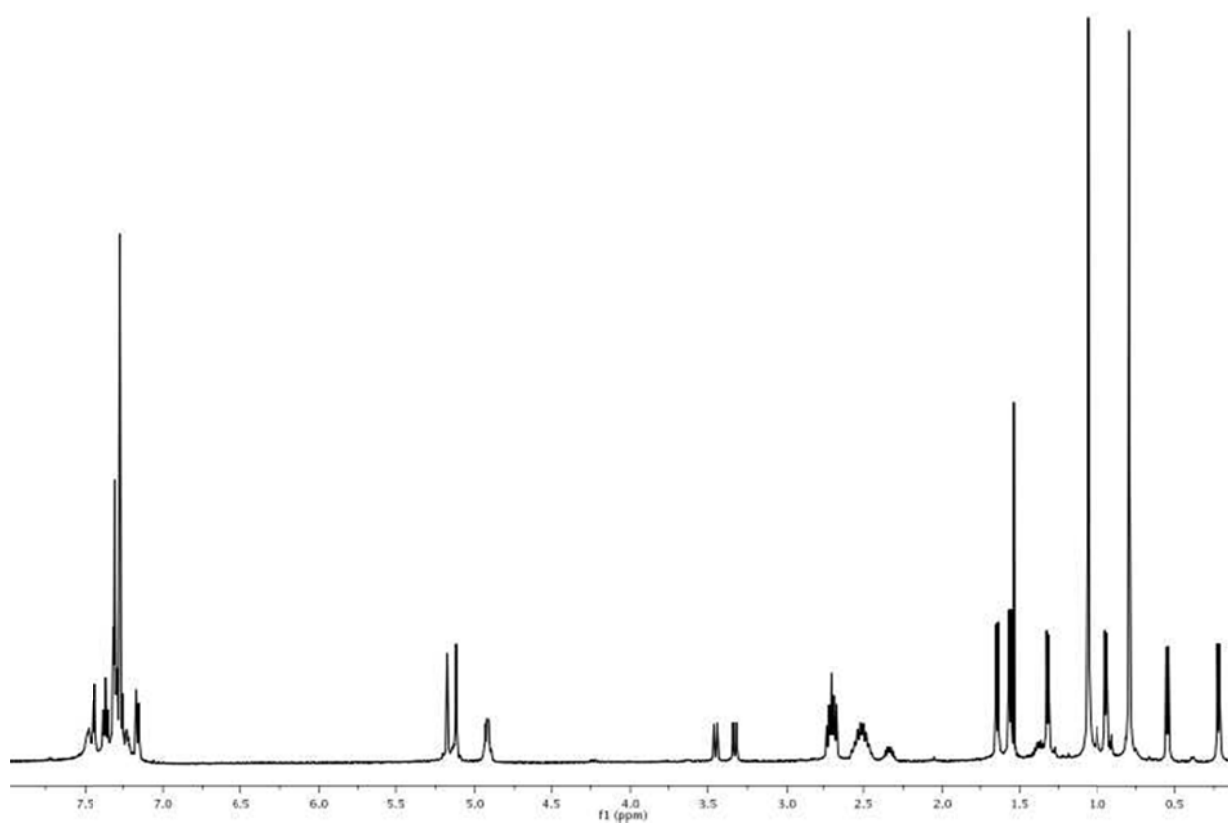

**Figure S1.**  $^1\text{H}$  NMR spectrum of F-TIPNO alkoxyamine **1b**

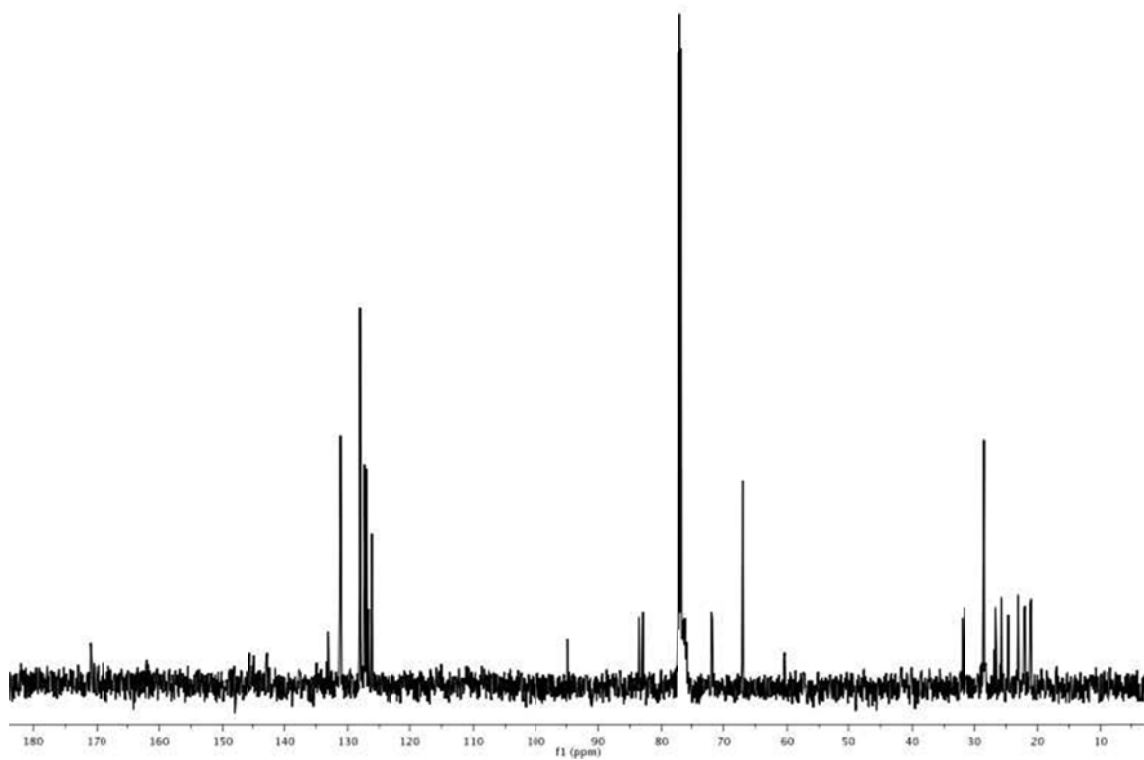

**Figure S2.**  $^{13}\text{C}$  NMR spectrum of F-TIPNO alkoxyamine **1b**

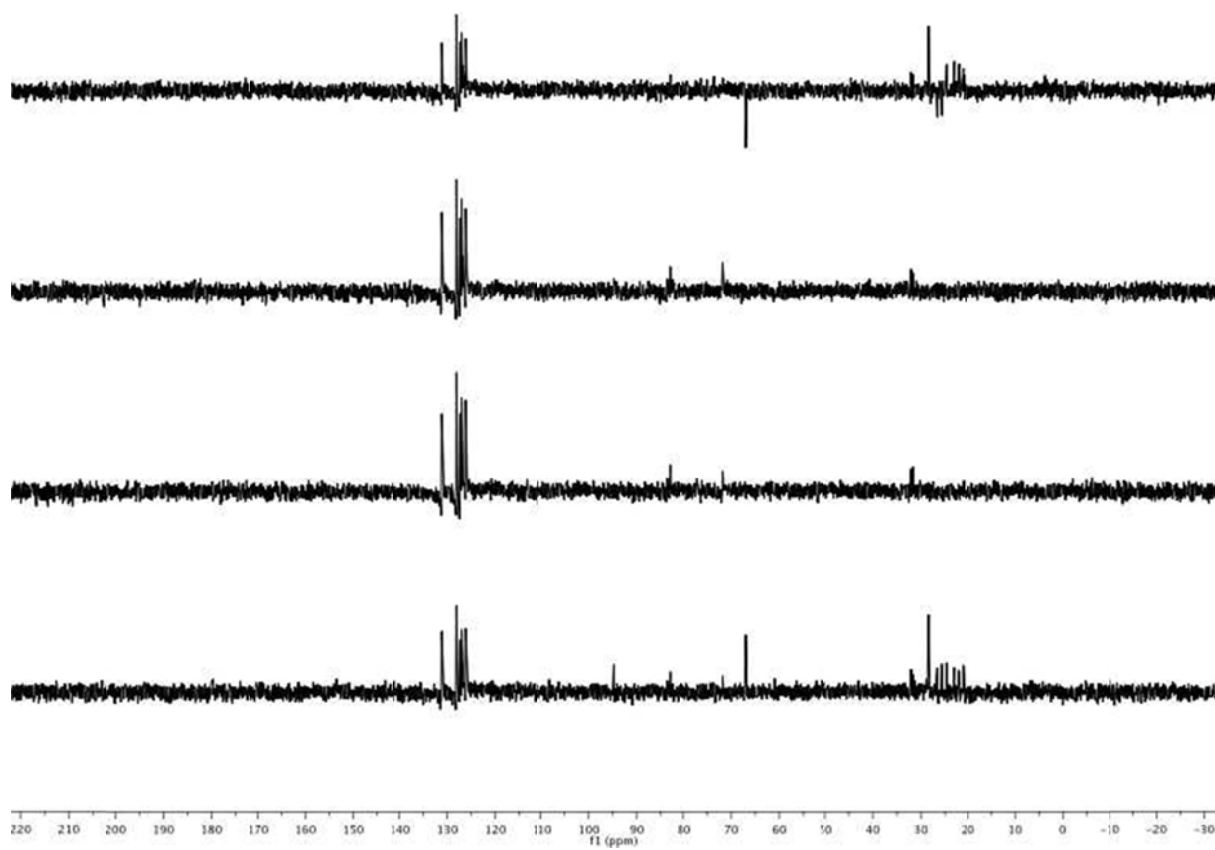

**Figure S3.** DEPT of F-TIPNO alkoxyamine **1b**

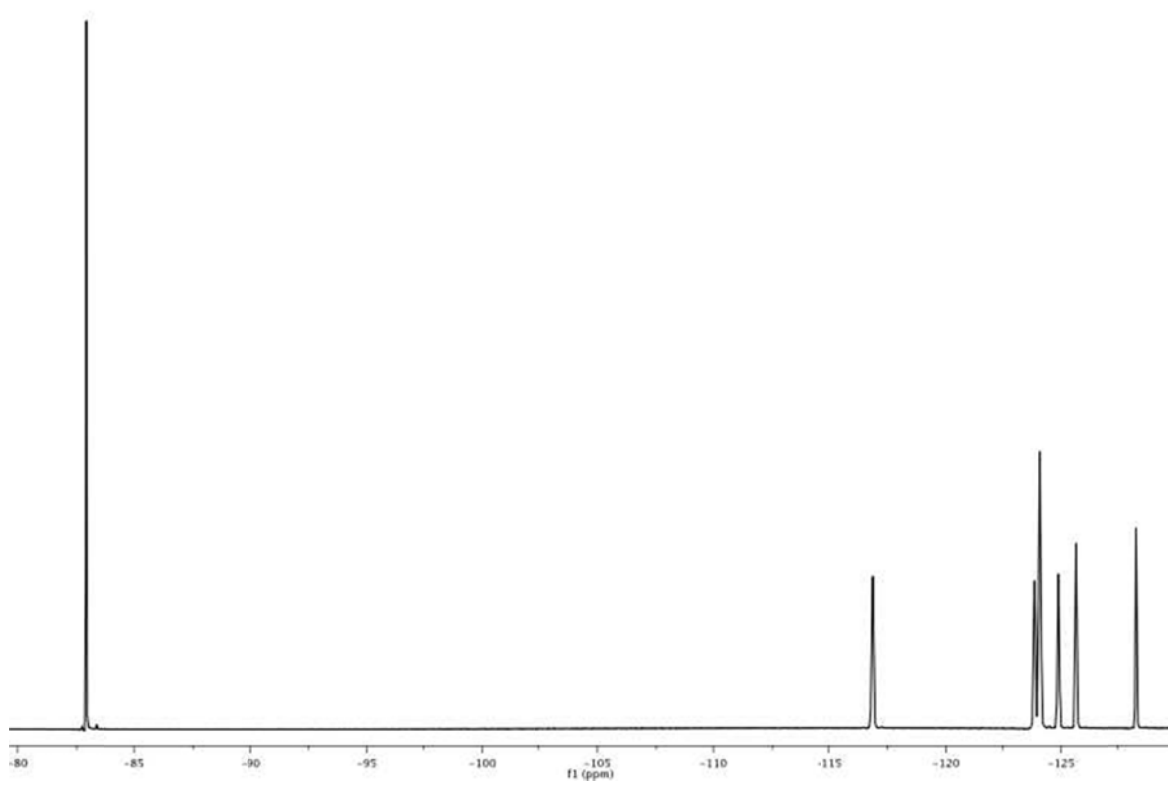

**Figure S4.**  $^{19}\text{F}$  NMR of F-TIPNO alkoxyamine **1b**

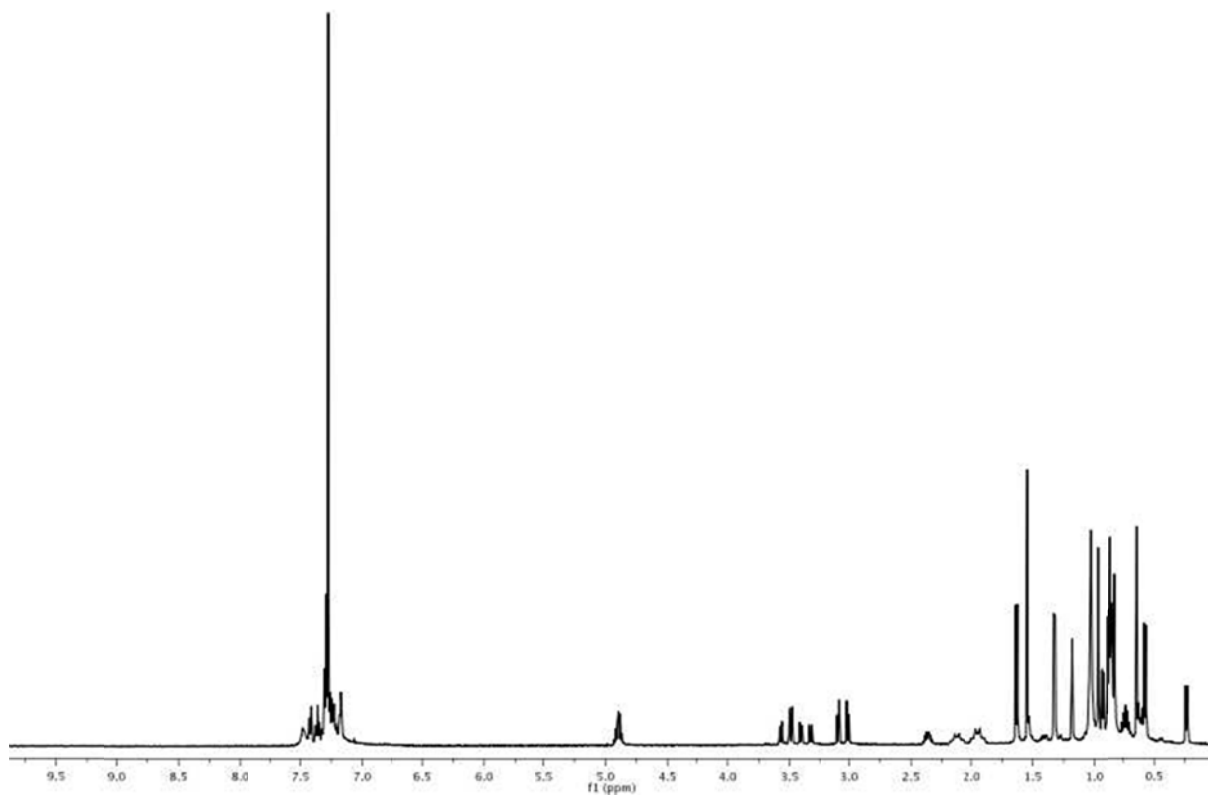

**Figure S5.**  $^1\text{H}$  NMR of F-Si-TIPNO alkoxyamine **1c**

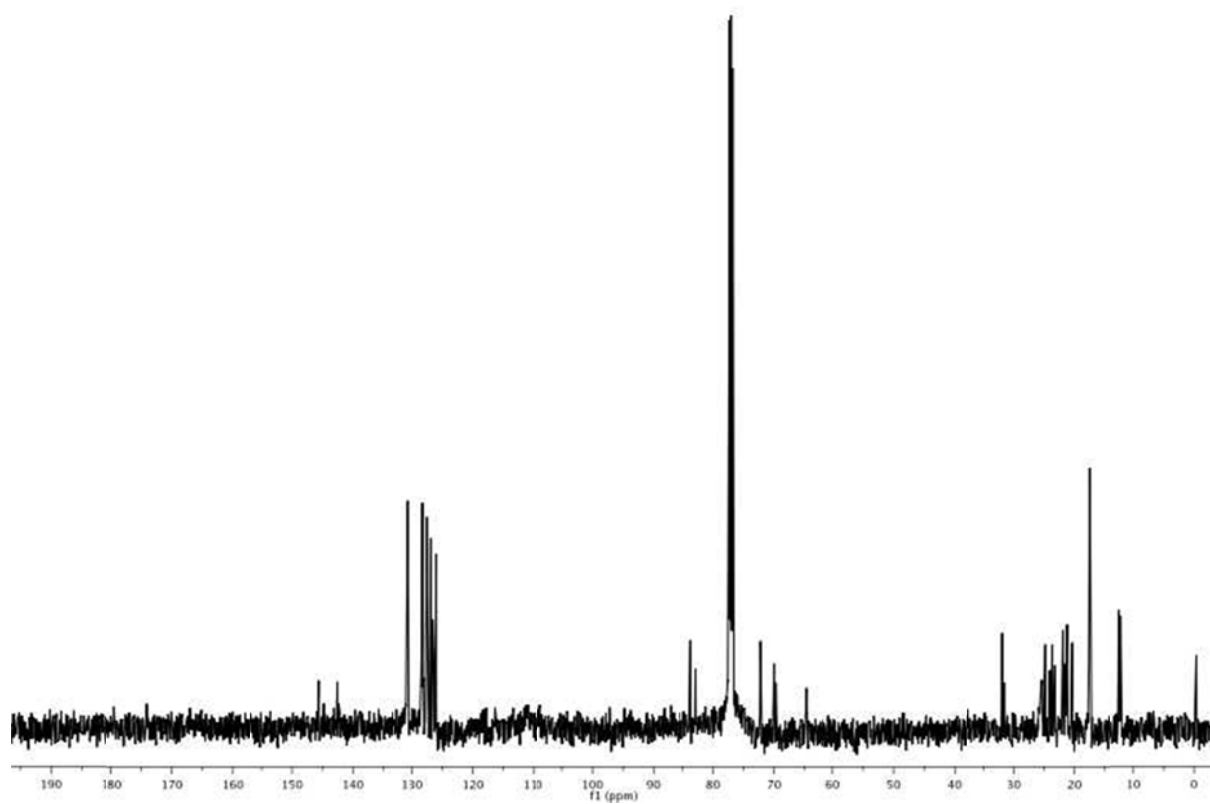

**Figure S6.**  $^{13}\text{C}$  NMR of F-Si-TIPNO alkoxyamine **1c**

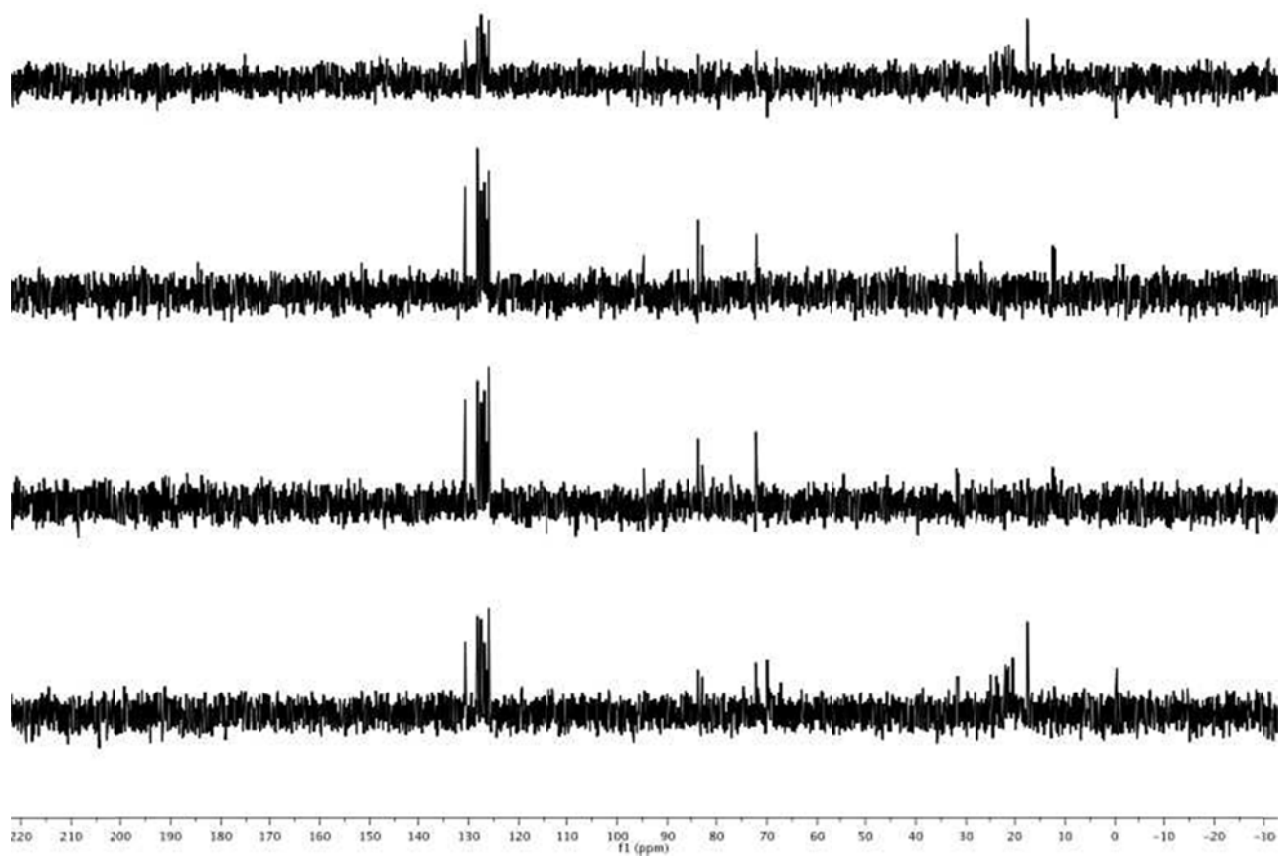

**Figure S7.** DEPT of F-Si-TIPNO alkoxyamine **1c**

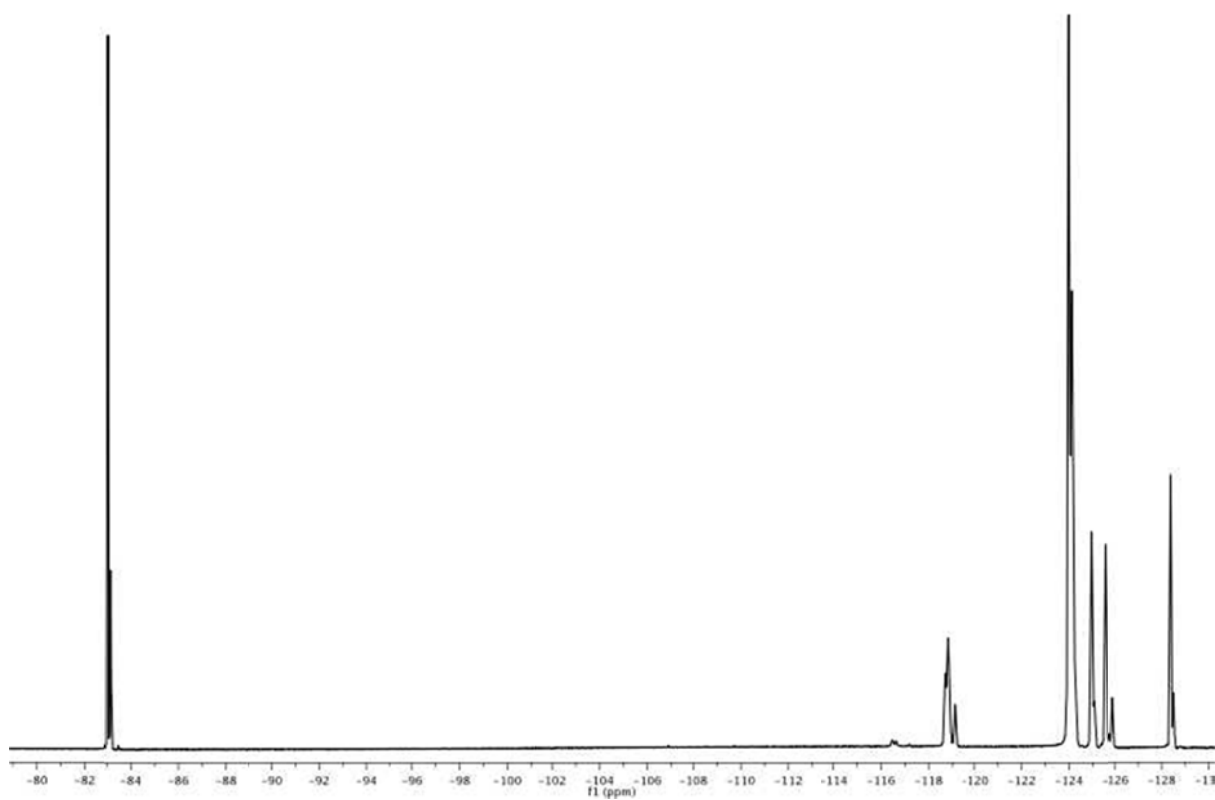

**Figure S8.**  $^{19}\text{F}$  NMR of F-Si-TIPNO alkoxyamine **1c**



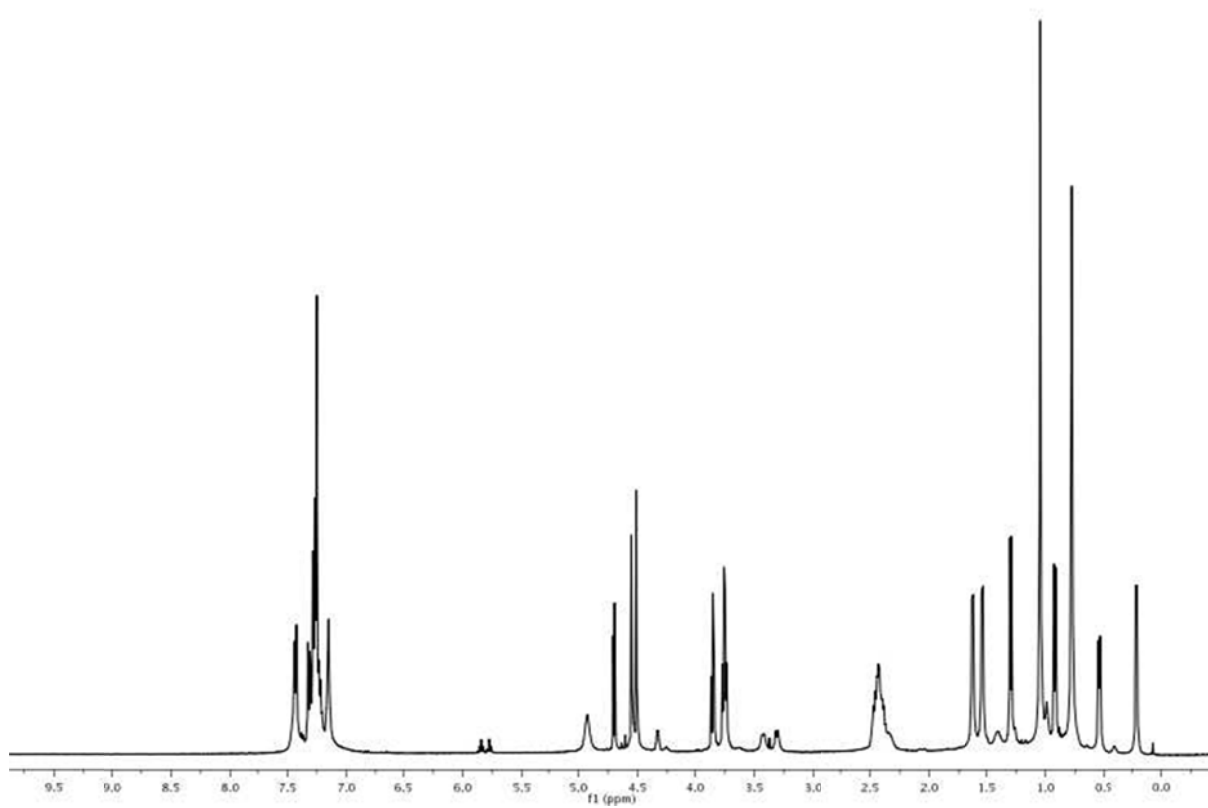

**Figure S9.**  $^1\text{H}$  NMR of TIPNO alkoxyamine F-Foot 2

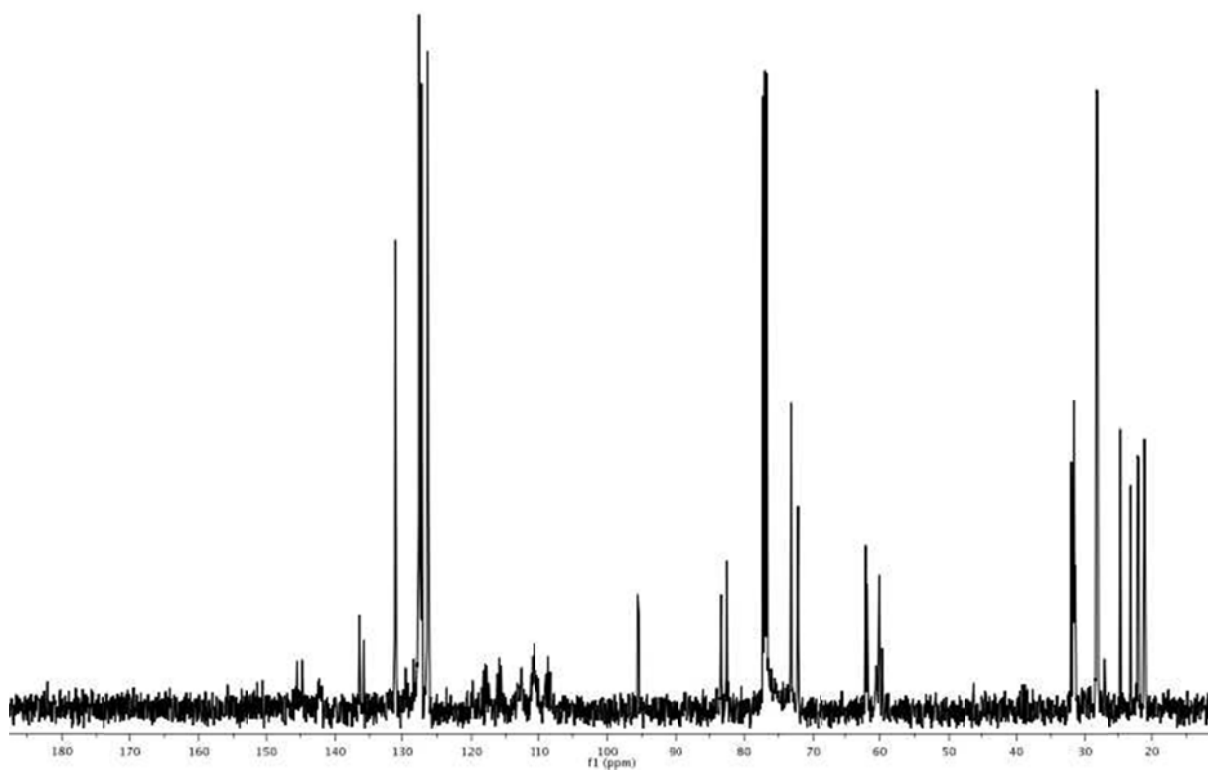

**Figure S10:**  $^{13}\text{C}$  NMR of TIPNO alkoxyamine F-Foot 2

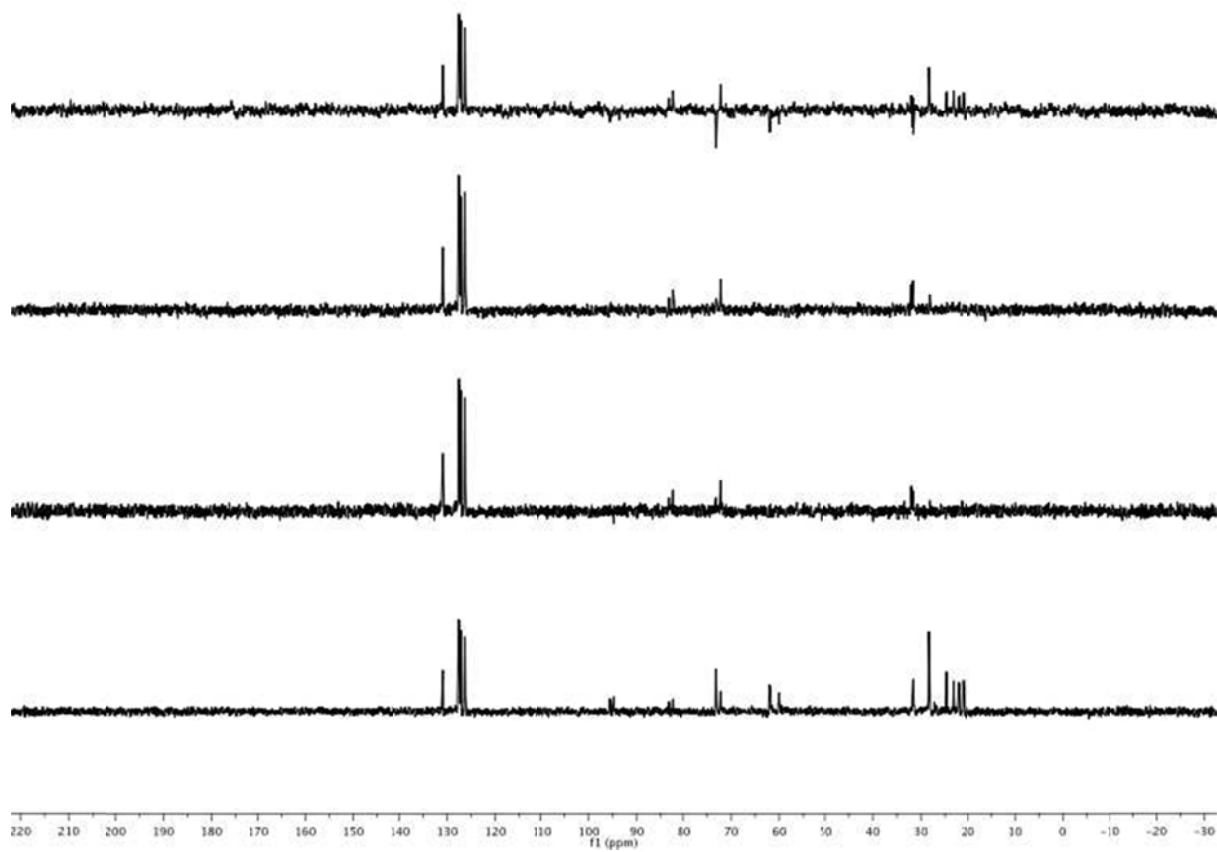

**Figure S11:** DEPT of TIPNO alkoxyamine F-Foot 2

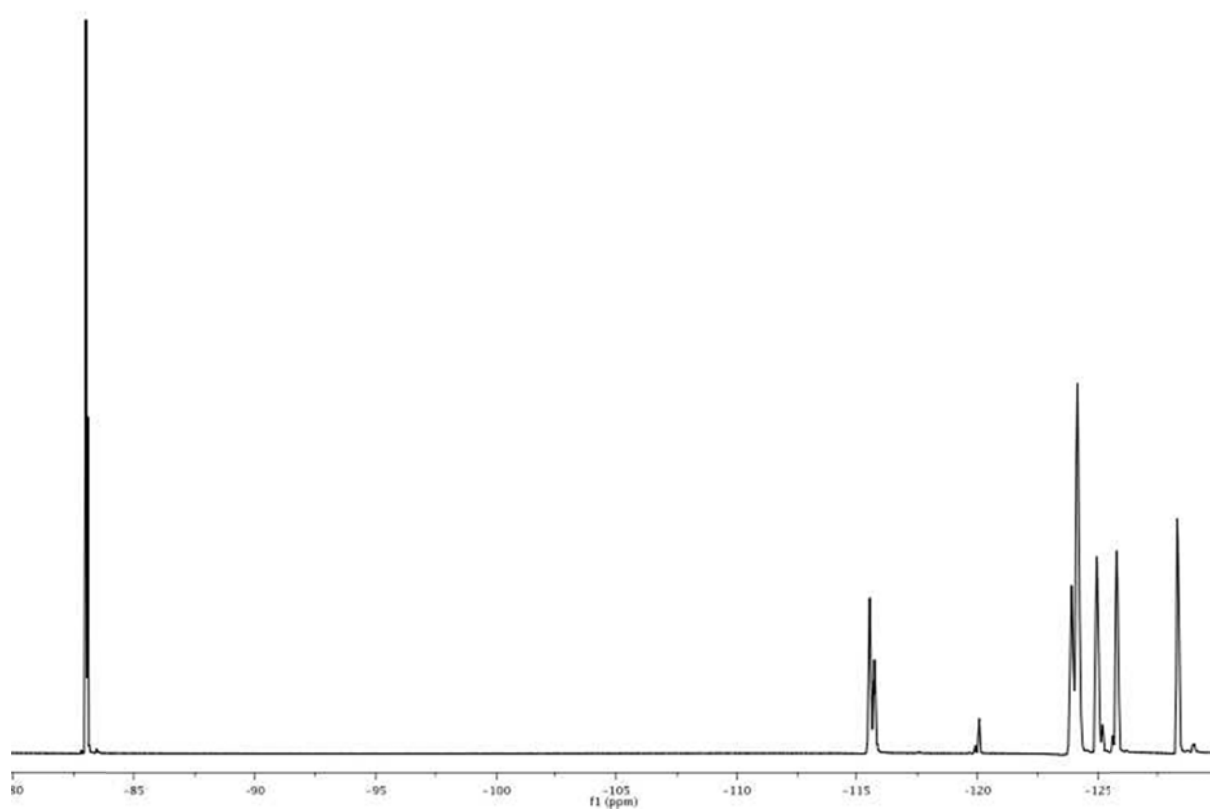

**Figure S12:**  $^{19}\text{F}$  NMR of TIPNO alkoxyamine F-Foot 2

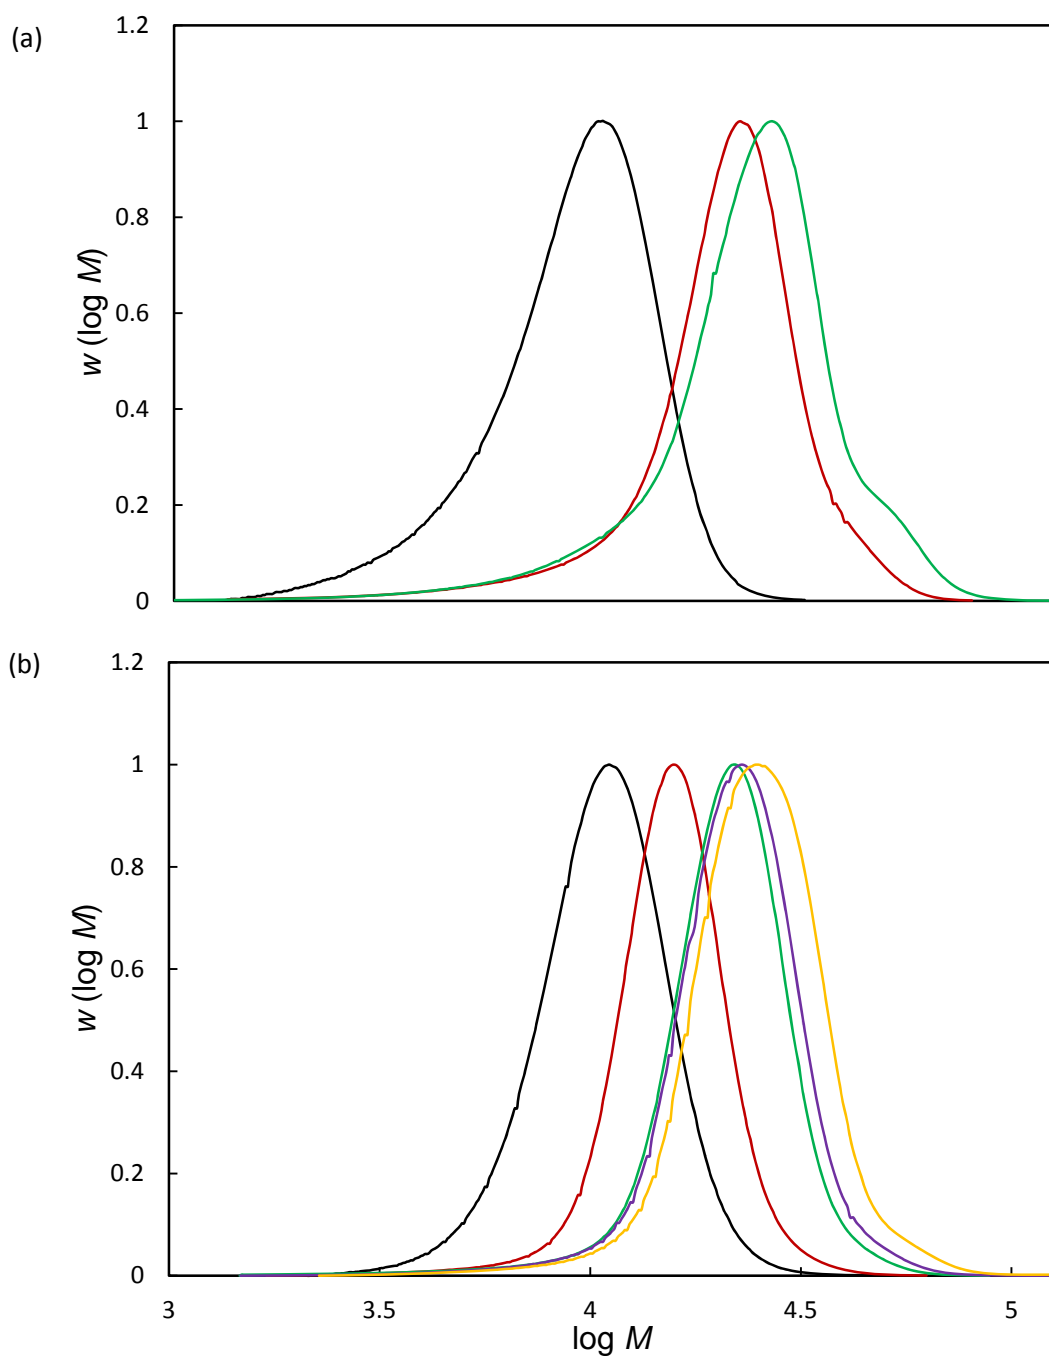

**Figure S13.** MWDs for alkoxyamine **1a** initiated NMP of styrene (50% w/v) at 110 °C using  $[\text{Monomer}]_0/[\text{Alkoxyamine}]_0 = 384$ : (a) Precipitation polymerizations in  $scCO_2$  at 30 MPa; conversions are 23 (black), 42 (red) and 49% (green) and (b) solution polymerization in toluene; conversions are 27 (black), 40 (red), 55 (green), 63 (purple) and 72% (orange).

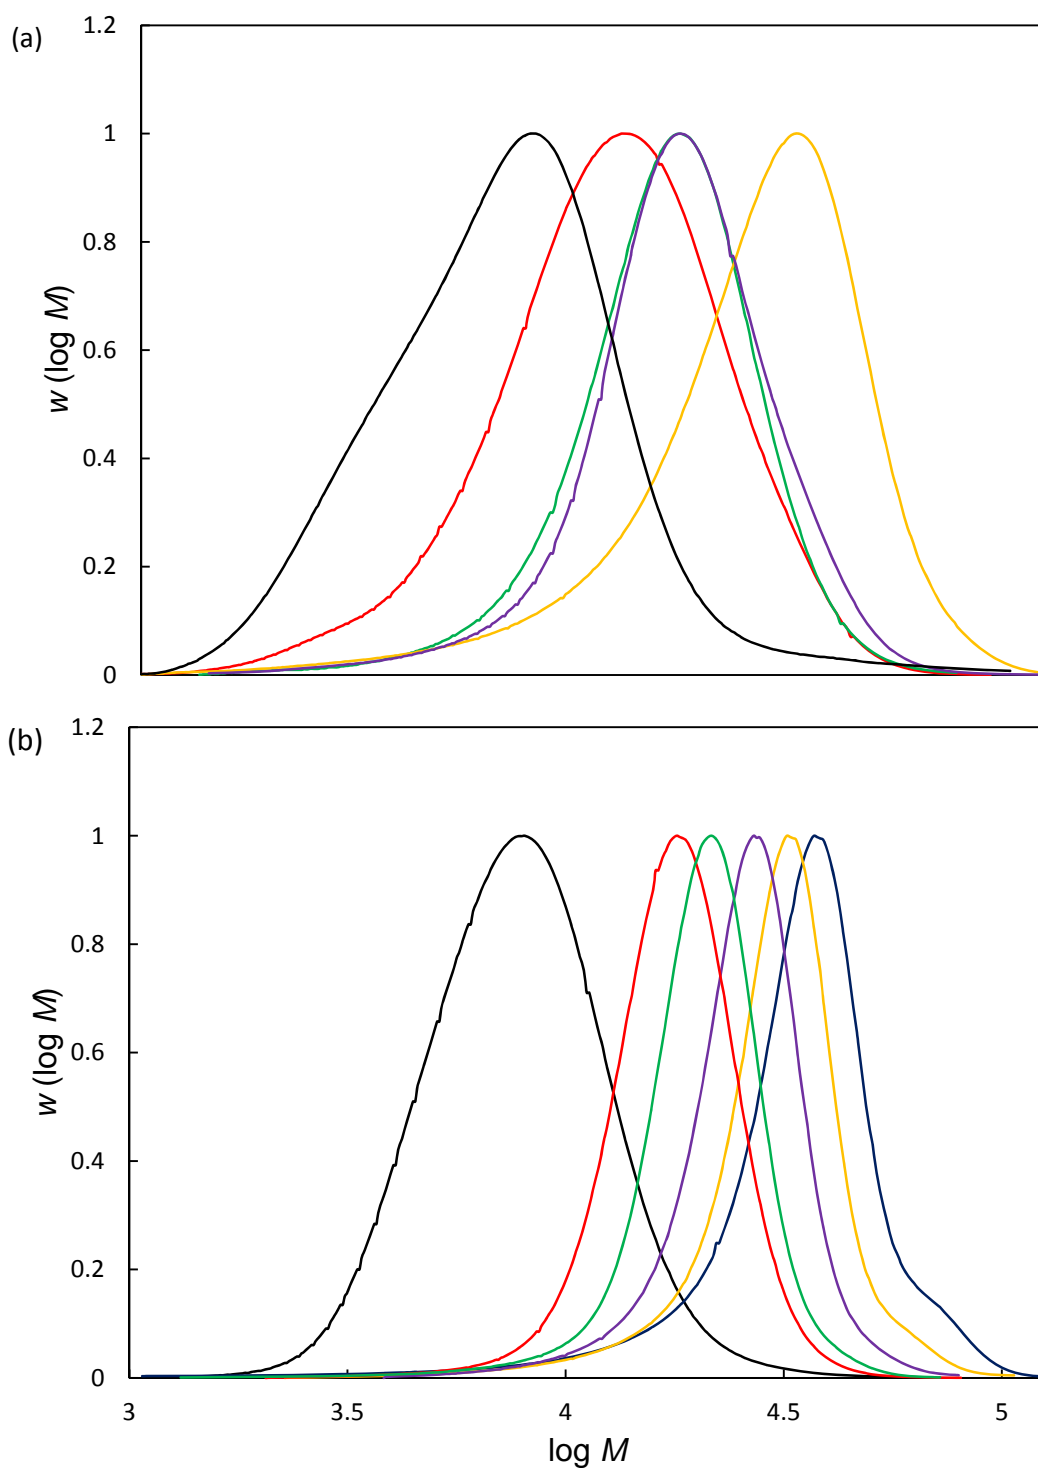

**Figure S14.** MWDs for alkoxyamine **1b** initiated NMP of styrene (50% w/v) at 110 °C using  $[\text{Monomer}]_0/[\text{Alkoxyamine}]_0 = 384$ : (a) Precipitation polymerizations in  $\text{scCO}_2$  at 30 MPa; conversions are 8 (black), 17 (red), 21 (green), 35 (purple) and 43% (orange) and (b) solution polymerizations in toluene; conversions are 13 (black), 33 (red), 51 (green), 63 (purple), 74% (orange) and 80 % (blue).

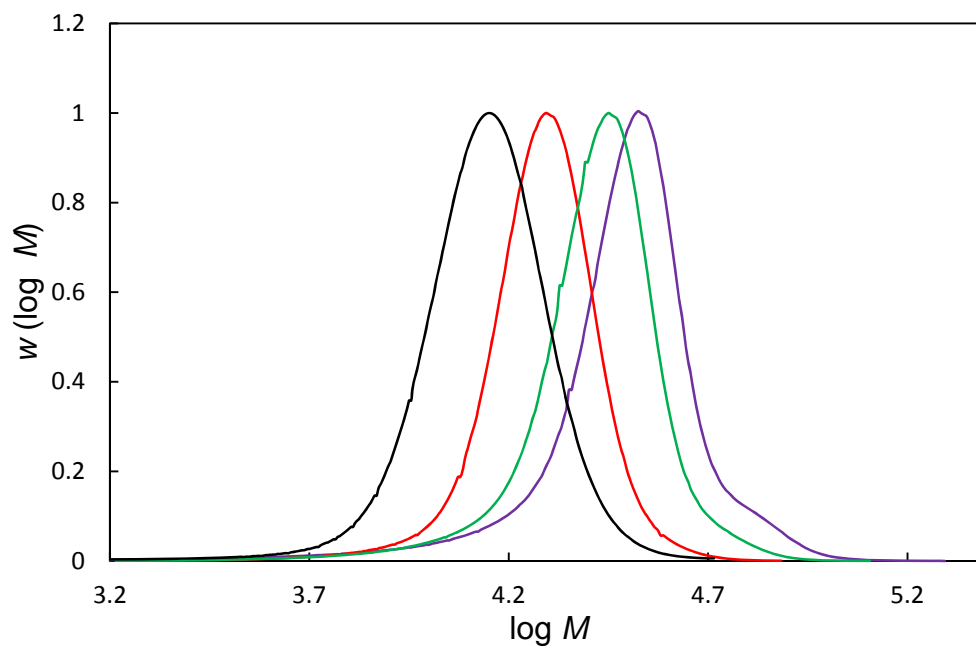

**Figure S15.** MWDs for alkoxyamine **1c** initiated solution NMP of styrene (50% w/v) at 110 °C in toluene using  $[\text{Monomer}]_0/[\text{Alkoxyamine}]_0 = 384$ : conversions are 24 (black), 44 (red), 65 (green) and 75% (purple).

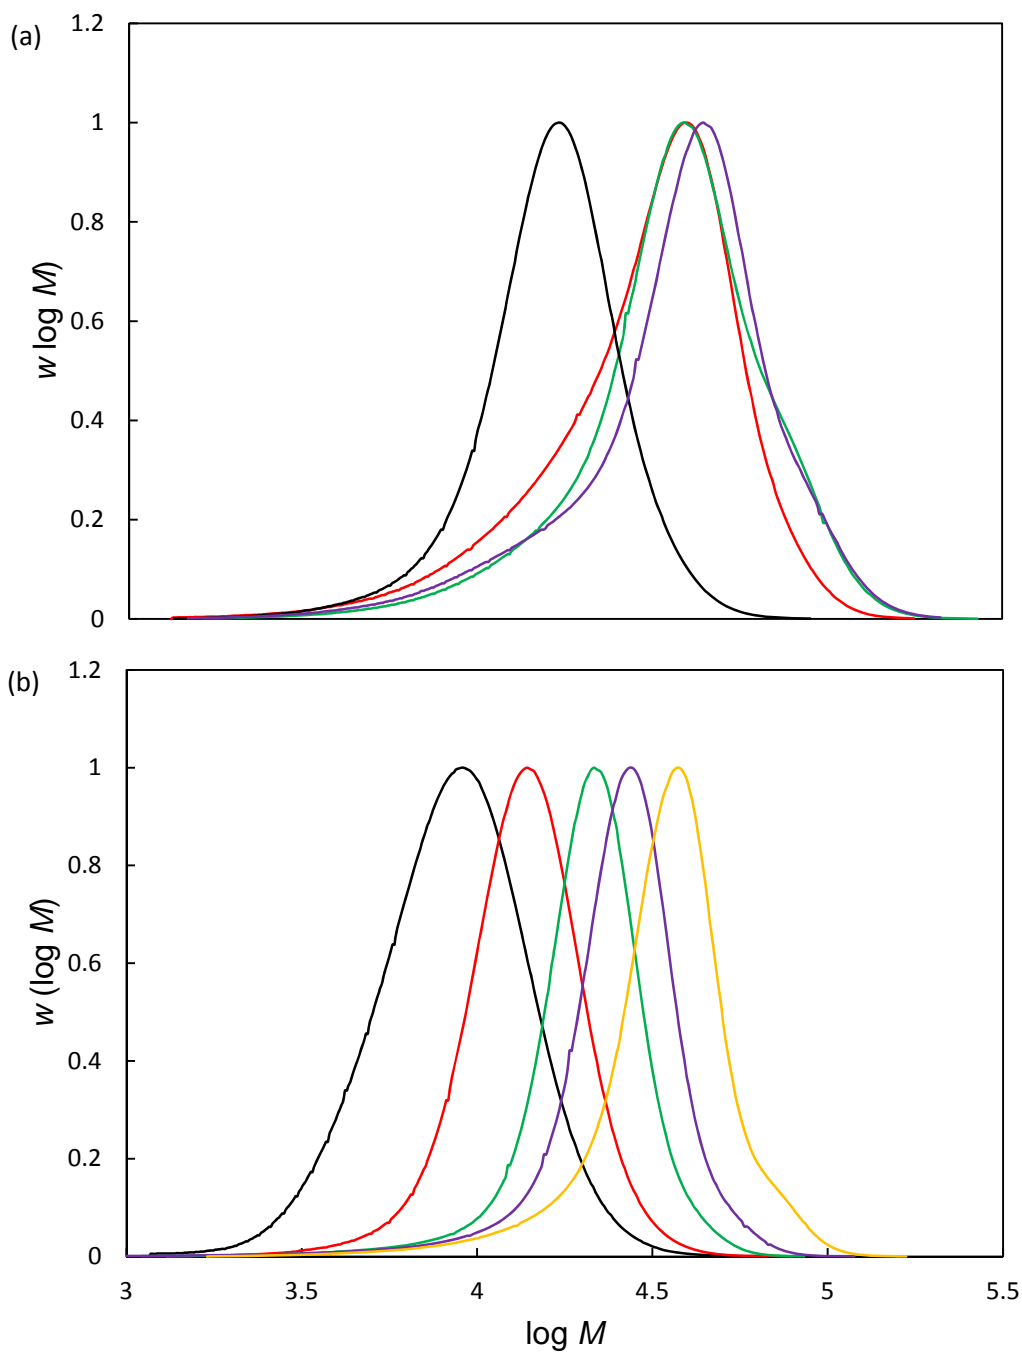

**Figure S16.** MWDs for the alkoxyamine **1d** initiated NMP of styrene (50% w/v) at 110 °C using  $[\text{Monomer}]_0/[\text{Alkoxyamine}]_0 = 384$ : (a) Precipitation polymerizations in  $scCO_2$  at 30 MPa; conversions are 20 (black), 33 (red), 47 (green) and 62 (purple) and (b) solution polymerizations in toluene; conversions are 17 (black), 31 (red), 51 (green), 62 (purple) and 82% (orange).



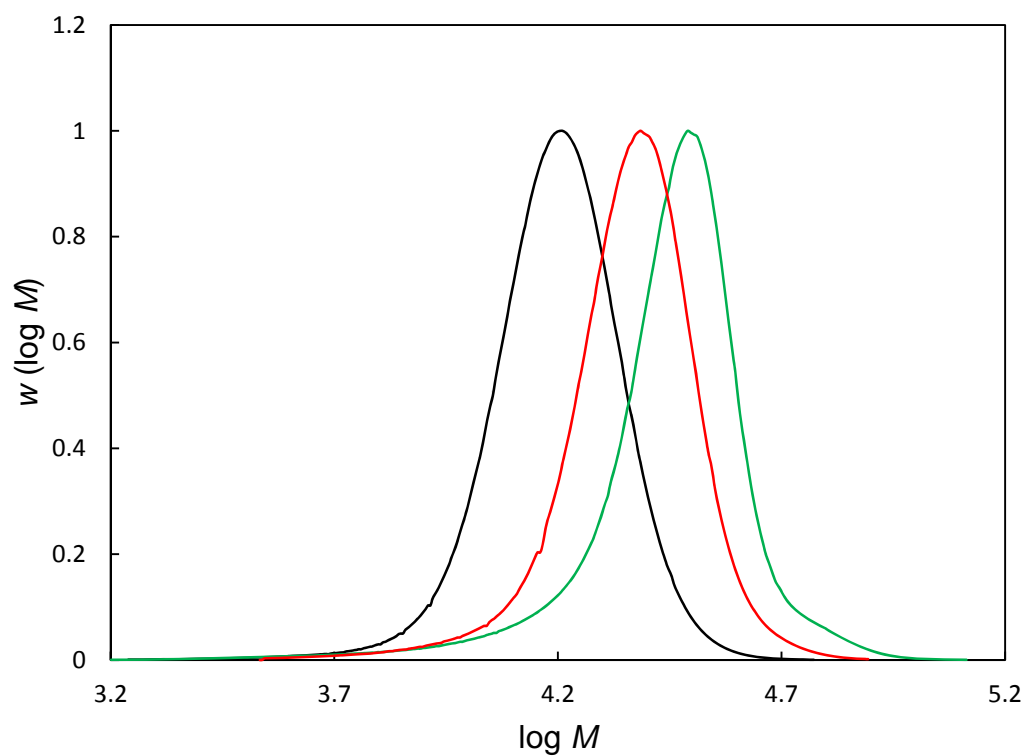

**Figure S17.** MWDs for alkoxyamine **2** initiated solution NMPs of styrene (50% w/v) at 110 °C in toluene using  $[\text{Monomer}]_0/[\text{Alkoxyamine}]_0 = 384$ : conversions are 38 (black), 61 (red) and 78% (green).

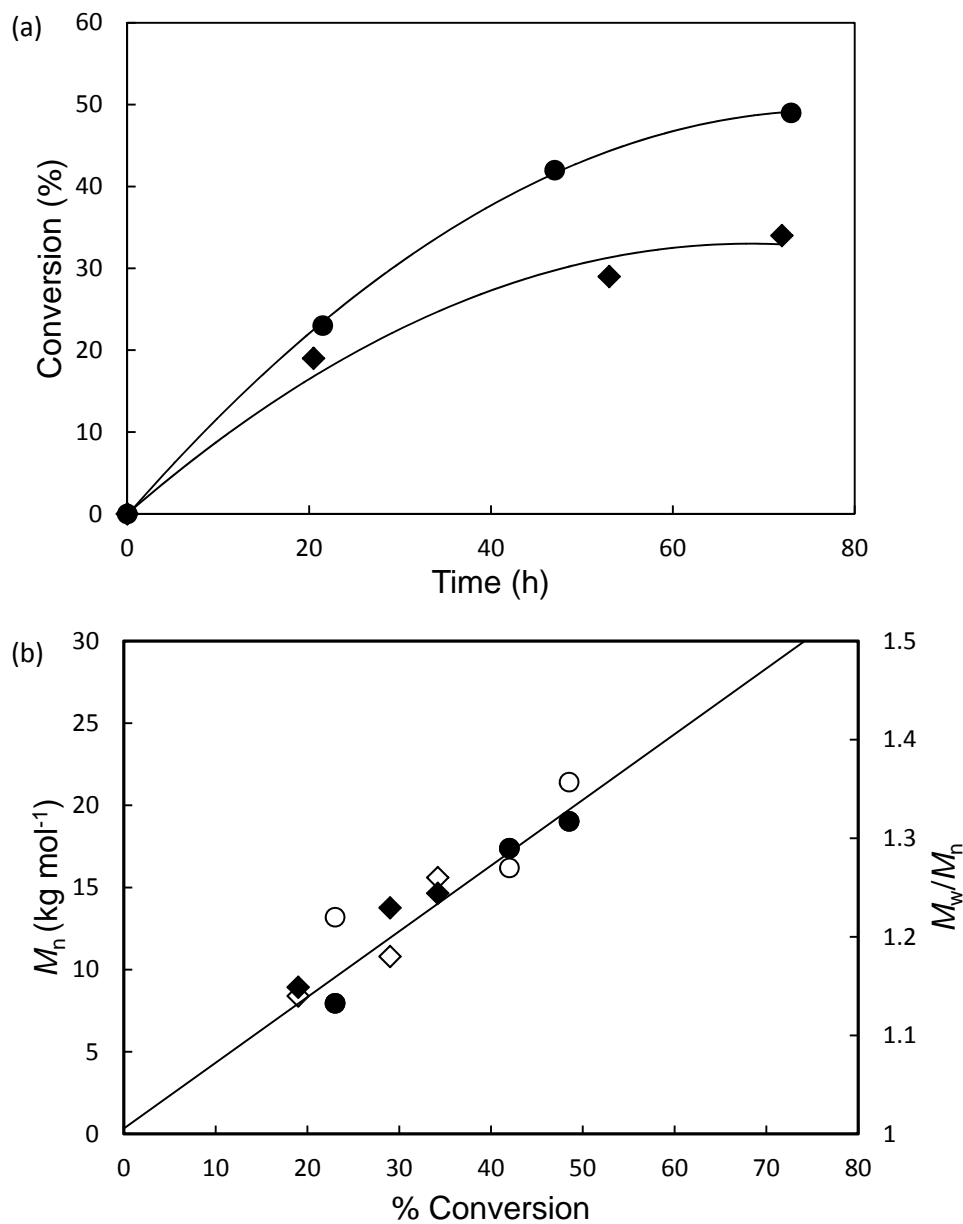

**Figure S18** The effect of free TIPNO on NMP in scCO<sub>2</sub> at 110 °C. (a) Conversion versus time and (b)  $M_n$  (closed symbols) and  $M_w/M_n$  (open symbols) vs conversion plots for TIPNO-**1a** alkoxyamine initiated precipitation NMP of styrene (50% w/v) using  $[\text{Monomer}]_0/[\text{Alkoxyamine}]_0 = 384$  with  $[\text{Free TIPNO}]_0/[\text{Alkoxyamine}]_0 = 0.05$  (diamonds) and  $[\text{Free TIPNO}]_0/[\text{Alkoxyamine}]_0 = 0$  (circles).

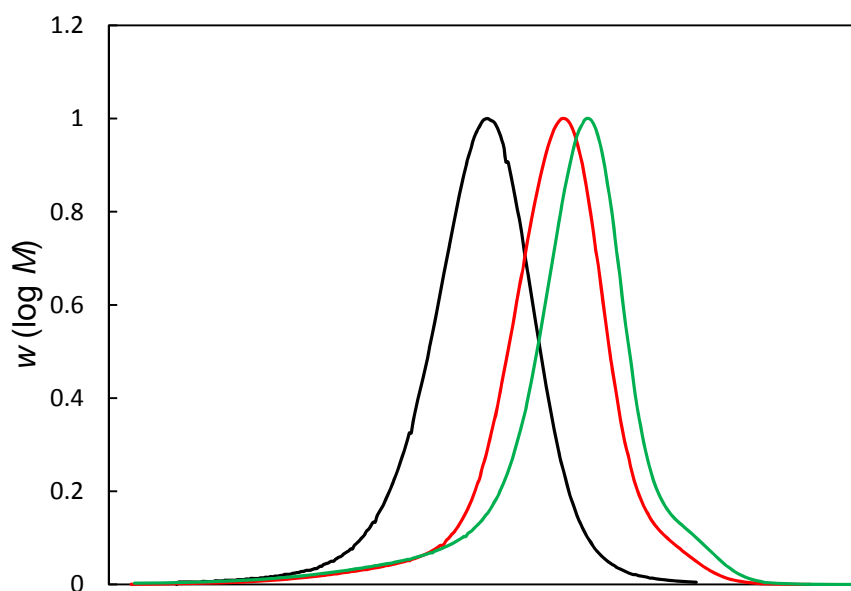

**Figure S19** MWDs for alkoxyamine **TIPNO-1a** initiated precipitation NMP of styrene (50% w/v) at 110 °C in scCO<sub>2</sub> using [Monomer]<sub>0</sub>/[Alkoxyamine]<sub>0</sub> = 384 with [Free TIPNO]<sub>0</sub>/[Alkoxyamine]<sub>0</sub> = 0.05: conversions are 19 (black), 29 (red) and 34% (green).
